# Supplementary material for: Temporal association between human upper respiratory and gut bacterial microbiomes during the course of COVID-19 in adults
Source: PubMed Central journal article supplement (PMC7893062; doi:10.1038/s42003-021-01796-w), 2021-02-18
Supplement: 42003_2021_1796_MOESM1_ESM.pdf [file 42003_2021_1796_MOESM1_ESM.pdf]

1 Supplementary materials

2 **Temporal association between human upper respiratory and gut bacterial**  
3 **microbiomes during the course of COVID-19 in adults**

4  
5 Running title: Upper respiratory and gut microbiomes in COVID-19 adults

6  
7 Rong Xu<sup>1,4,#</sup>, Renfei Lu<sup>2,#</sup>, Tao Zhang<sup>3,#</sup>, Qunfu Wu<sup>3,#</sup>, Weihua Cai<sup>2</sup>, Xudong Han<sup>2</sup>,  
8 Zhenzhou Wan<sup>5</sup>, Xia Jin<sup>1\*</sup>, Zhigang Zhang<sup>3\*</sup>, Chiyu Zhang<sup>1,4\*</sup>

9  
10 1. Shanghai Public Health Clinical Center, Fudan University, Shanghai 201508, China

11 2. Clinical Laboratory, Nantong Third Hospital Affiliated to Nantong University,  
12 Nantong 226006, China

13 3. State Key Laboratory for Conservation and Utilization of Bio-Resources in Yunnan,  
14 School of Life Sciences, Yunnan University, Kunming, Yunnan 650091, China

15 4. Pathogen Discovery and Evolution Unit, Institut Pasteur of Shanghai, Chinese  
16 Academy of Sciences, Shanghai 200031, China.

17 5. Medical Laboratory of Taizhou Fourth People's Hospital, Taizhou 225300 China

18  
19 # These authors contributed equally to this work.

20  
21 \* Correspondence authors: Chiyu Zhang, Shanghai Public Health Clinical Center,  
22 Fudan University, Shanghai 201508, China. Email: [zhangcy1999@hotmail.com](mailto:zhangcy1999@hotmail.com)

23 Or Zhigang Zhang, State Key Laboratory for Conservation and Utilization of Bio-  
24 Resources in Yunnan, School of Life Sciences, Yunnan University, No. 2 North Cuihu  
25 Road, Kunming, Yunnan 650091, China. Email: [zhangzhigang@ynu.edu.cn](mailto:zhangzhigang@ynu.edu.cn)

26 Or Xia Jin, Shanghai Public Health Clinical Center, Fudan University, Shanghai 201508,  
27 China. Email: [jinxia@shphc.org.cn](mailto:jinxia@shphc.org.cn)

28



29

30 **Supplementary figure S1. COIVD-19 patient admission and discharge time as well as the point**

31 **of detection of SARS-CoV-2.** a. the hospitalization of p13 was 40 days. b. the information of these

32 patients was unavailable. DAY 1 was the day of symptom onset. Some COVID-19 patients were

33 initially found/confirmed elsewhere and their samples were unavailable for this study. A lack of

34 positive samples in some patients (e.g. P05, P11 and P25) were due to the unavailability of early

35 positive samples.

36



37

38 **Supplementary figure S2. Group distribution characteristics of each community cluster. Total**

39 number is shown in parentheses.

40



41

42 **Supplementary figure S3. Margalef index of each community cluster.** Margalef's index of

43 clusters showed similar trends with richness as other analyses of Richness in both throat and anal

44 samples. Margalef's index for each sample is calculated with the number of species (n) in sample

45 minus 1 divided by the natural logarithm of the total sample count of cluster (N) in which the sample

46 was included. Margalef's index =  $(n-1) / \ln(N)$ .

47



48

49 **Supplementary figure S4. Time-scale changes of indicators of throat microbial community**

50 **types.** Color sectors represent relative abundance of indicators in different COVID-19 stages.

51 Linked to [Figure 1](#).

52



53

54 **Supplementary figure S5. Dynamic changes of alpha-diversity since appearance of symptoms**  
 55 **in COVID-19 patients.**

56



57

58 **Supplementary figure S6. Dynamic changes of microbiome diversity over time during**

59 **COVID-19 in eight patients. a) Richness, b) Pielou evenness.**

60



61

62 **Supplementary Figure S7. Time-scale changes of indicators of gut microbial community types.**

63 Color sectors represent relative abundance of indicators in different COVID-19 stages. Linked to

64 [Figure 2.](#)

65



66

67 **Supplementary Figure S8. Enrichment analysis of impact factors on throat microbial**

68 **community typing.** a) Sex, b) Age, c) Virus detection, and d) Antibiotic uses. Enrichment analysis

69 was performed by using the Fisher's exact test under FDR-adjusted  $P < 0.05$ . Sample numbers were

70 shown on the bar. Only COVID-19 patients were used for this analysis.

71



72

73 **Supplementary Figure S9. Enrichment analysis of impact factors on gut microbial community**

74 **typing.** a) Sex, b) Age, c) Virus detection, and d) Antibiotic uses. Enrichment analysis was

75 performed by using the Fisher's exact test under FDR-adjusted  $P < 0.05$ . No significant enrichment

76 was observed. Sample numbers were shown on the bar.

77

A (throat)



B (anal)



78

79 **Supplementary figure S10. Correlation of microbiome diversity with clinical parameters. a)**

80 Correlation between rectum microbiota diversity index and clinical parameters (Correlation

81 coefficient (r) were marked in cells for correlation pairs with  $p < 0.05$ ). b) Correlation between Throat

82 swab microbiota diversity index and clinical parameters (Correlation coefficient (r) were marked in

83 cells for correlation pairs with  $p < 0.05$ ).

84



85

86 **Supplementary figure S11. Correlation between microbiome diversity and LPS levels. a)**

87 Richness, b) Peilou evenness.

88





93

94 **Supplementary Figure S13. Putative restoration model of the respiratory and gut**  
 95 **microbiomes over time in adults with mild COVID-19.** SARS-CoV-2 infection resulted in a fast  
 96 dysbiosis in both the respiratory tract and gut at the very early phase of the disease. A fast restoration  
 97 of both the respiratory and gut microbiomes from early dysbiosis towards late more diverse status  
 98 was observed in most adults with mild COVID-19 albeit they seemed to have a relatively slow  
 99 clinical recovery. This model reflects the major microbiome dynamic change in most adults with  
 100 mild COVID-19 but not all features in all patients, especially in those with severe disease.

Supplemental table S1. The LPS level of the serum of patients.

| Patients | Day | LPS level |
|----------|-----|-----------|
| P03      | 15  | <5        |
|          | 4   | <5        |
| P05      | 6   | 72.39     |
|          | 8   | 63.87     |
|          | 10  | 45.66     |
|          | 29  | <5        |
| P07      | 31  | <5        |
|          | 35  | <5        |
|          | 10  | 201.4     |
| P09      | 27  | 35.65     |
|          | 33  | <5        |
|          | 34  | <5        |
| P10      | 15  | 43.17     |
|          | 22  | 40.87     |
| P36      | 4   | <5        |
|          | 16  | <5        |
|          | 5   | <5        |
| P35      | 12  | <5        |
|          | 16  | <5        |
|          | 6   | <5        |
|          | 8   | <5        |
| P11      | 10  | <5        |
|          | 12  | <5        |
|          | 14  | <5        |
|          | 16  | <5        |
|          | 7   | <5        |
| P13      | 13  | <5        |
|          | 15  | 81.05     |
|          | 17  | 62.04     |
| P17      | 11  | <5        |
|          | 19  | 72.08     |
| P25      | 5   | <5        |
|          | 7   | 74.11+    |
|          | 7   | <5        |
| P29      | 16  | 51.62     |
|          | 22  | <5        |
| P33      | 24  | <5        |
| P23      | 2   | 22.24     |
| P08      | 9   | <5        |
|          | 21  | 60.13     |

Supplementary table S2. Dynamic changes of clinical parameters of 13 COVID-19 patients.

| Patents Number | Detection Data after Symptom Onset <sup>i</sup> | Total T lymphocyte count/ $\mu$ L | Percentage of CD4/CD8 T lymphocytes/% | CD4/CD8 T lymphocyte ratio | Percentage of suppressed T lymphocytes/CTL/% | Suppressed T lymphocytes/CTL count/ $\mu$ L | Percentage of NK cell/% | Percentage of B lymphocytes/% | Lymphocyte count/ $\mu$ L | C reactive protein/mg/L |
|----------------|-------------------------------------------------|-----------------------------------|---------------------------------------|----------------------------|----------------------------------------------|---------------------------------------------|-------------------------|-------------------------------|---------------------------|-------------------------|
| P02            | Day 11                                          | 1089                              | 48.33                                 | 2.3                        | 21                                           | 292                                         | 8.3                     | 13.63                         | 1430                      | 8.5                     |
| P03            | Day 11                                          | 674                               | 39.8                                  | 1.27                       | 31.23                                        | 280                                         | 22.67                   | 7.37                          | 960                       | 0.7                     |
|                | Day 14                                          | 440                               | 23.87                                 | 0.85                       | 28.17                                        | 221                                         | 25.17                   | 20.7                          | 829                       | <0.4                    |
|                | Day 17                                          | 1069                              | 49.1                                  | 1.8                        | 27.33                                        | 378                                         | 5.3                     | 16.97                         | 1396                      | <0.5                    |
|                | Day 21                                          | 1940                              | 54.83                                 | 1.78                       | 30.77                                        | 676                                         | 8.57                    | 6.3                           | 2271                      | <0.5                    |
| P05            | Day 3                                           | 1383                              | 18.23                                 | 0.63                       | 29.07                                        | 661                                         | 26.9                    | 12.37                         | 2328                      | 5.68                    |
|                | Day 9                                           | 2146                              | 20.43                                 | 0.65                       | 31.5                                         | 1000                                        | 23.47                   | 11.57                         | 3371                      | 10                      |
| P07            | Day 8                                           | 527                               | 40.40                                 | 1.82                       | 22.20                                        | 171                                         | 14.43                   | 19.63                         | 814                       |                         |
|                | Day 16                                          | 592                               | 39.57                                 | 1.62                       | 24.40                                        | 213                                         | 9.00                    | 24.03                         | 901                       |                         |
|                | Day 21                                          | 1041                              | 42.77                                 | 1.72                       | 24.93                                        | 355                                         | 8.17                    | 21.80                         | 1502                      |                         |
|                | Day 23                                          | 1057                              | 47.23                                 | 2.38                       | 19.87                                        | 274                                         | 6.97                    | 21.30                         | 1499                      |                         |
|                | Day 25                                          | 859                               | 46.47                                 | 2.02                       | 23.00                                        | 255                                         | 6.17                    | 20.77                         | 1189                      | 38.8                    |
|                | Day 31                                          | 967                               | 44.93                                 | 1.69                       | 26.60                                        | 340                                         | 9.13                    | 17.63                         | 1320                      |                         |
| P09            | Day 12                                          | 288                               | 34.93                                 | 1.44                       | 24.27                                        | 121                                         | 22.57                   | 19.40                         | 497                       | 50.3                    |
|                | Day 19                                          | 635                               | 49.73                                 | 2.49                       | 20.00                                        | 180                                         | 8.10                    | 24.47                         | 946                       | 12.2                    |
|                | Day 23                                          | 508                               | 47.07                                 | 1.79                       | 26.23                                        | 184                                         | 12.20                   | 16.37                         | 715                       |                         |
|                | Day 28                                          | 898                               | 56.77                                 | 2.56                       | 22.20                                        | 240                                         | 7.50                    | 10.97                         | 1146                      | <0.5                    |
|                | Day 33                                          | 1021                              | 51.07                                 | 2.16                       | 22.27                                        | 305                                         | 11.57                   | 13.53                         | 1491                      | 13.63                   |
| P10            | Day 15                                          | 554                               | 56.90                                 | 3.80                       | 14.97                                        | 112                                         | 10.07                   | 16.63                         | 757                       |                         |
|                | Day 20                                          | 863                               | 55.13                                 | 2.71                       | 20.37                                        | 222                                         | 7.40                    | 16.37                         | 1136                      |                         |
| P11            | Day 8                                           | 1242                              | 43.23                                 | 1.20                       | 36.00                                        | 530                                         | 14.53                   | 6.00                          | 1565                      | 3.88                    |

|     |        |      |       |      |       |      |       |       |      |        |
|-----|--------|------|-------|------|-------|------|-------|-------|------|--------|
|     | Day 15 | 1238 | 40.53 | 1.17 | 34.70 | 528  | 13.73 | 8.47  | 1604 | 1.30   |
| P13 | Day 9  | 1757 | 39.97 | 1.81 | 22.07 | 571  | 21.30 | 15.73 | 2731 | 1.75   |
|     | Day 16 | 1801 | 44.13 | 2.16 | 20.40 | 525  | 8.07  | 23.67 | 2684 | 1.73   |
|     | Day 13 | 2110 | 36.30 | 1.40 | 25.93 | 760  | 12.30 | 19.30 | 3114 | 2.76   |
| P17 | Day 20 | 2777 | 35.43 | 1.26 | 28.20 | 1105 | 14.77 | 16.47 | 4059 | 1.55   |
|     | Day 5  | 1354 | 42.23 | 1.94 | 21.73 | 420  | 11.27 | 18.23 | 1972 | 4.02   |
| P25 | Day 9  | 1500 | 38.27 | 2.15 | 17.80 | 388  | 18.63 | 15.53 | 2339 | 2.46   |
|     | Day 13 | 1139 | 30.23 | 1.49 | 20.33 | 385  | 29.00 | 11.80 | 1946 | 4.04   |
|     | Day 9  | 320  | 18.47 | 0.59 | 31.07 | 185  | 20.00 | 23.57 | 622  |        |
| P29 | Day 9  | 357  | 40.47 | 1.58 | 25.53 | 127  | 16.73 | 14.90 | 534  | <0.3   |
|     | Day 24 | 641  | 34.53 | 1.28 | 26.90 | 264  | 27.90 | 9.00  | 1026 | 1.31   |
| P33 | Day 6  | 584  | 46.33 | 2.16 | 21.50 | 171  | 15.57 | 8.83  | 821  |        |
|     | Day 9  | 242  | 27.33 | 1.47 | 18.60 | 87   | 34.70 | 13.37 | 489  |        |
|     | Day 11 | 314  | 23.37 | 1.41 | 16.53 | 121  | 25.27 | 27.77 | 751  | <0.499 |
|     | Day 16 | 822  | 56.13 | 3.12 | 18.00 | 193  | 4.70  | 20.47 | 1106 | 18.6   |

<sup>i</sup> the Day 1 was the time point disease onset, the first date of each patients in this table was the first day of hospitalization.
