# Supplementary material for: Temporal association between human upper respiratory and gut bacterial microbiomes during the course of COVID-19 in adults
Source: PubMed Central journal article supplement (PMC7893062; doi:10.1038/s42003-021-01796-w), 2021-02-18
Supplement: 42003_2021_1796_MOESM8_ESM.pdf [file 42003_2021_1796_MOESM8_ESM.pdf]

## **Description of Additional Supplementary Files**

**File name:** Supplementary Data 1.

**Description:** Throat and gut microbial abundances (phyla and genera). The 16S-rRNA gene sequences of all samples used in this study.

**File name:** Supplementary Data 2.

**Description:** Clinical index of COVID-19 patients in this study. Demographic and clinical characteristics of these patients.

**File name:** Supplementary Data 3.

**Description:** Dynamic changes of clinical parameters of 13 COVID-19 patients. The clinical index during the course of disease.

**File name:** Supplementary Data 4.

**Description:** The original raw source data needed to create figure files.

**File name:** Supplementary Code.

**Description:** The analyses scripts/code of the correlation analysis R package.
